# Supplementary material for: Archaeal Haloarcula californiae Icosahedral Virus 1 Highlights Conserved Elements in Icosahedral Membrane-Containing DNA Viruses from Extreme Environments
Source: PubMed Central journal article supplement (PMC4958249; doi:10.1128/mbio.00699-16), 2016-07-19

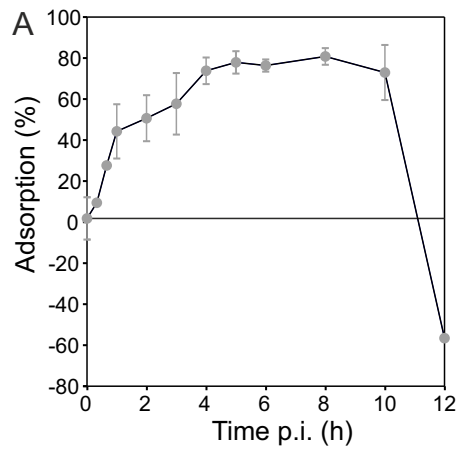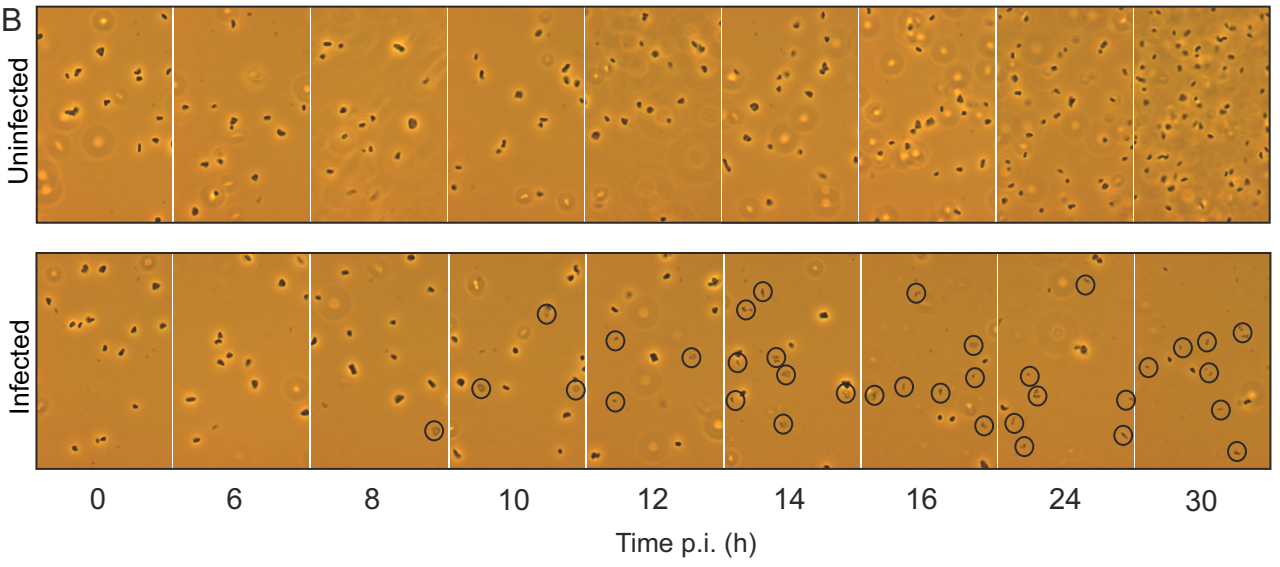

Supplement: mbo004162905sf2.pdf [file mbo004162905sf2.pdf]
