# Supplementary material for: Archaeal Haloarcula californiae Icosahedral Virus 1 Highlights Conserved Elements in Icosahedral Membrane-Containing DNA Viruses from Extreme Environments
Source: PubMed Central journal article supplement (PMC4958249; doi:10.1128/mbio.00699-16), 2016-07-19
Supplement: mbo004162905sf5.pdf [file mbo004162905sf5.pdf]

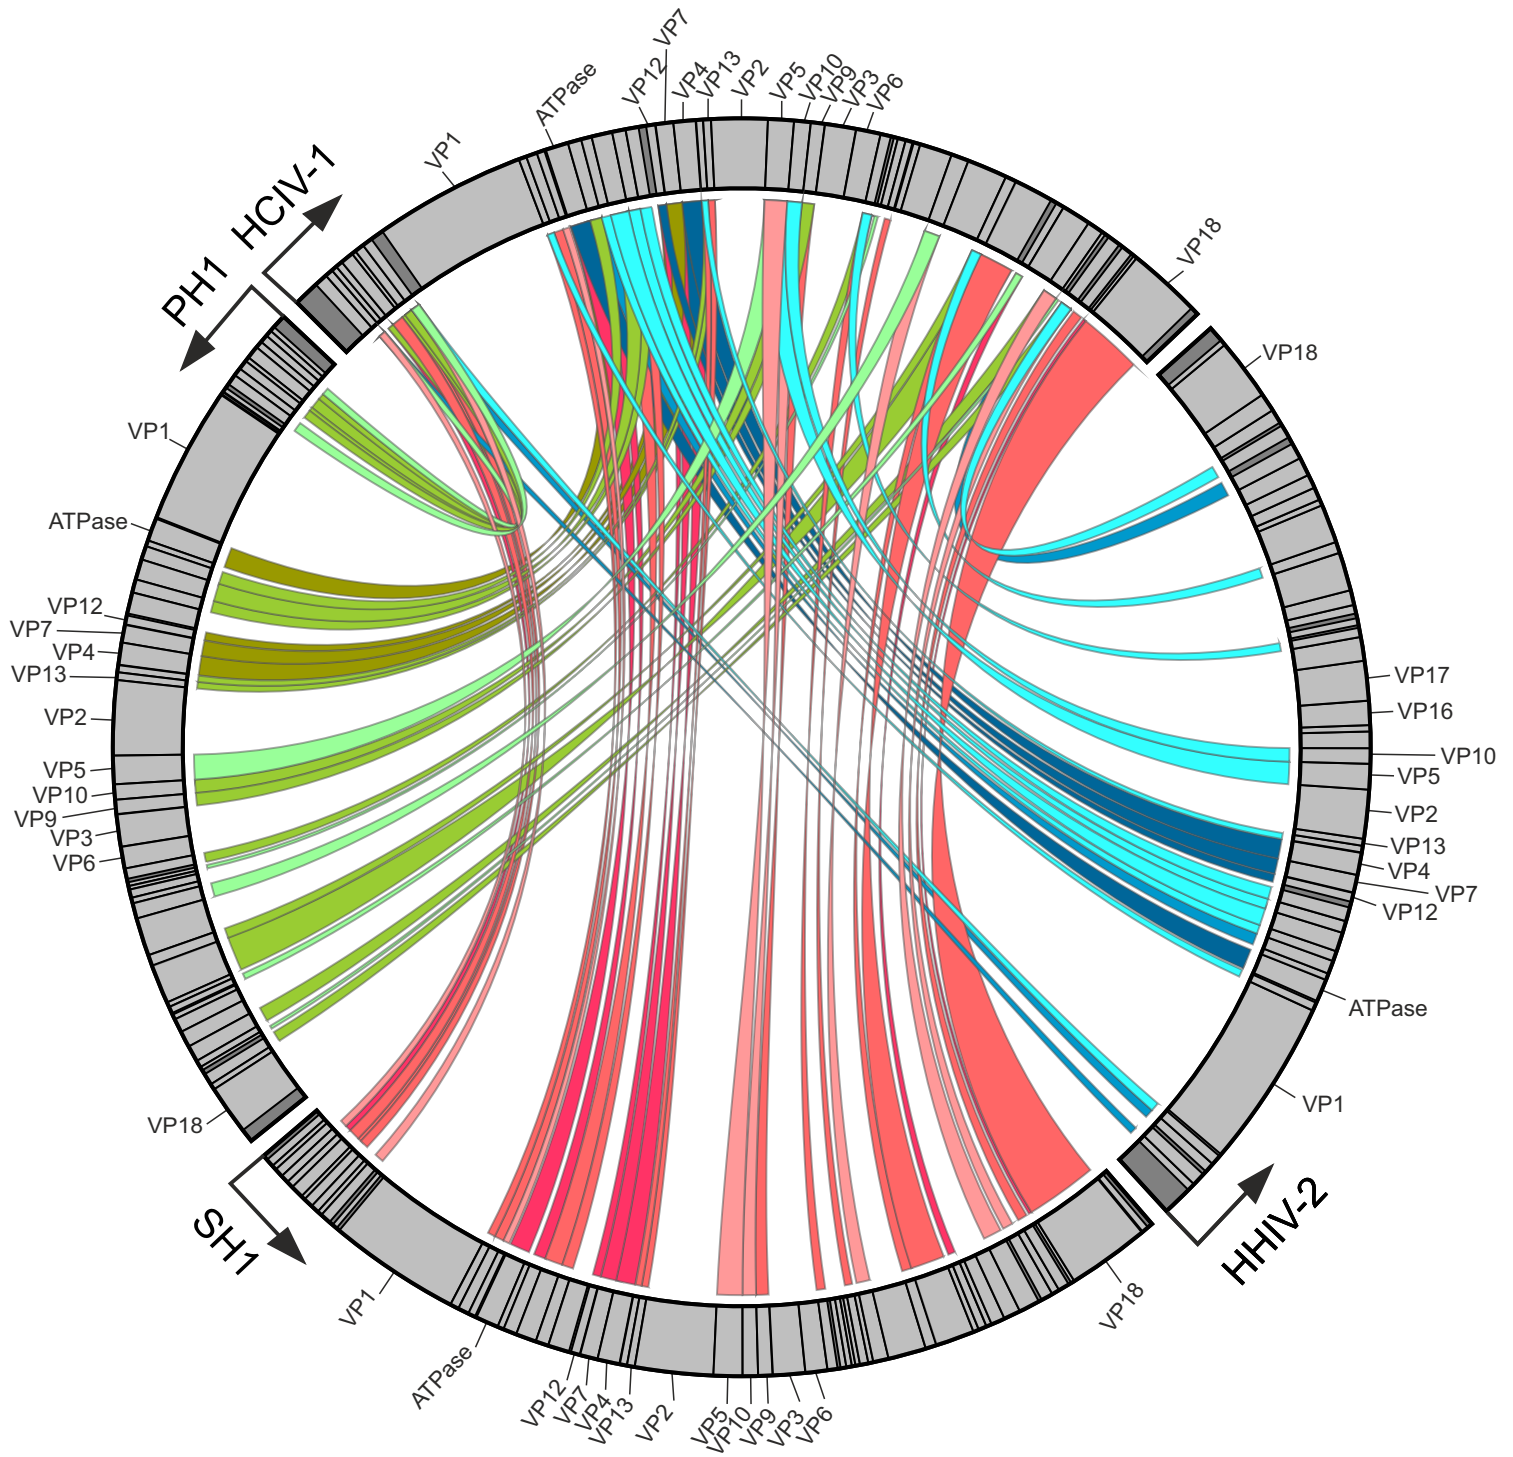

| HCIV-1 compared to |     |        | Amino acid similarity |
|--------------------|-----|--------|-----------------------|
| PH1                | SH1 | HHIV-2 |                       |
|                    |     |        | 55-70%                |
|                    |     |        | 70-85%                |
|                    |     |        | >85%                  |
