# Supplementary material for: Archaeal Haloarcula californiae Icosahedral Virus 1 Highlights Conserved Elements in Icosahedral Membrane-Containing DNA Viruses from Extreme Environments
Source: PubMed Central journal article supplement (PMC4958249; doi:10.1128/mbio.00699-16), 2016-07-19
Supplement: mbo004162905st1.pdf [file mbo004162905st1.pdf]

TABLE S1. Recovery of infectious particles during HCIV-1 purification.

| Purification step                       | Titer (PFU/ml) <sup>a</sup> | Total PFUs <sup>b</sup> | Recovery of infectivity (%) |
|-----------------------------------------|-----------------------------|-------------------------|-----------------------------|
| Cell lysate                             | $1.4 \times 10^{10}$        | $1.4 \times 10^{13}$    | 100.0                       |
| PEG-NaCl precipitate                    | $1.1 \times 10^{12}$        | $1.0 \times 10^{13}$    | 71.4                        |
| Purified viral zone in sucrose gradient | $1.3 \times 10^{11}$        | $6.2 \times 10^{12}$    | 44.3                        |
| Purified viral zone in CsCl gradient    | $1.6 \times 10^{11}$        | $4.8 \times 10^{12}$    | 34.5                        |
| Concentrate (twice-purified virus)      | $1.8 \times 10^{13}$        | $2.4 \times 10^{12}$    | 17.2                        |

<sup>a</sup> Average of six independent experiments.

<sup>b</sup> Calculated per liter of culture.
