# Supplementary material for: Archaeal Haloarcula californiae Icosahedral Virus 1 Highlights Conserved Elements in Icosahedral Membrane-Containing DNA Viruses from Extreme Environments
Source: PubMed Central journal article supplement (PMC4958249; doi:10.1128/mbio.00699-16), 2016-07-19
Supplement: mbo004162905st2.pdf [file mbo004162905st2.pdf]

TABLE S2. HCIV-1 ORFs and genes.

| ORF/<br>gene | Protein               | Cons.<br>domains <sup>a</sup> | Direction <sup>b</sup> | Start <sup>c</sup> | Stop <sup>c</sup> | GC (%) | Residues | Calc. MW<br>(kDa) | Calc.<br>pI | TMH <sup>d</sup> | Coils <sup>e</sup> | Similar viral (putative) proteins <sup>f</sup>                     | Amino acid<br>similarity<br>(%) |
|--------------|-----------------------|-------------------------------|------------------------|--------------------|-------------------|--------|----------|-------------------|-------------|------------------|--------------------|--------------------------------------------------------------------|---------------------------------|
| ORF 1        | putative<br>protein 1 |                               | F                      | 815                | 1234              | 72.9   | 140      | 14.93             | 4.45        |                  |                    | HSTV-2 hypothetical protein HSTV2 69                               | 43.3                            |
|              |                       |                               |                        |                    |                   |        |          |                   |             |                  |                    | HRTV-7 hypothetical protein HRTV7 67                               | 43.3                            |
|              |                       |                               |                        |                    |                   |        |          |                   |             |                  |                    | HRTV-5 hypothetical protein HRTV5 78                               | 44.4                            |
|              |                       |                               |                        |                    |                   |        |          |                   |             |                  |                    | HRTV-8 hypothetical protein HRTV8 80                               | 38.4                            |
|              |                       |                               |                        |                    |                   |        |          |                   |             |                  |                    | HF2 hypothetical protein HF2p037                                   | 38.7                            |
| ORF 2        | putative<br>protein 2 |                               | F                      | 1235               | 1483              | 68.3   | 83       | 9.01              | 4.30        |                  |                    | HHIV-2 putative protein 1                                          | 70.6                            |
|              |                       |                               |                        |                    |                   |        |          |                   |             |                  |                    | SH1 ORF 4 product                                                  | 61.2                            |
|              |                       |                               |                        |                    |                   |        |          |                   |             |                  |                    | PH1 hypothetical protein HhPH1_gp03                                | 58.8                            |
| ORF 3        | putative<br>protein 3 |                               | F                      | 1485               | 1664              | 66.1   | 60       | 6.82              | 11.20       | 1                | -                  |                                                                    |                                 |
| ORF 4        | putative<br>protein 4 |                               | F                      | 1661               | 1888              | 68     | 76       | 8.62              | 3.90        |                  |                    | SH1 ORF 5 product                                                  | 88.0                            |
|              |                       |                               |                        |                    |                   |        |          |                   |             |                  |                    | PH1 hypothetical protein HhPH1_gp04                                | 80.0                            |
| ORF 5        | putative<br>protein 5 |                               | F                      | 1881               | 2300              | 71.2   | 140      | 14.51             | 4.75        | 2                |                    | SH1 ORF 6 product                                                  | 78.1                            |
|              |                       |                               |                        |                    |                   |        |          |                   |             |                  |                    | PH1 hypothetical protein HhPH1_gp05                                | 73.0                            |
|              |                       |                               |                        |                    |                   |        |          |                   |             |                  |                    | HHIV-2 putative protein 2                                          | 48.7                            |
| ORF 6        | putative<br>protein 6 |                               | F                      | 2297               | 2434              | 71.7   | 46       | 4.84              | 8.19        |                  | +                  | -                                                                  |                                 |
| ORF 7        | putative<br>protein 7 |                               | F                      | 2427               | 2735              | 68.3   | 103      | 11.72             | 4.59        |                  |                    | SH1 ORF 8 product                                                  | 84.6                            |
|              |                       |                               |                        |                    |                   |        |          |                   |             |                  |                    | PH1 hypothetical protein HhPH1_gp07                                | 84.3                            |
|              |                       |                               |                        |                    |                   |        |          |                   |             |                  |                    | HHIV-2 putative protein 3                                          | 72.9                            |
|              |                       |                               |                        |                    |                   |        |          |                   |             |                  |                    | HHTV-2 hypothetical protein HHTV2 26                               | 41.7                            |
|              |                       |                               |                        |                    |                   |        |          |                   |             |                  |                    | Mycobacterium phage Dori gp40                                      | 41.7                            |
|              |                       |                               |                        |                    |                   |        |          |                   |             |                  |                    | Bacillus phage G gp248                                             | 41.0                            |
|              |                       |                               |                        |                    |                   |        |          |                   |             |                  |                    | Bacillus phage vB BanS-Tsamsa<br>hypothetical protein gp17         | 36.2                            |
|              |                       |                               |                        |                    |                   |        |          |                   |             |                  |                    | Streptomyces phage Jay2Jay hypothetical<br>protein PBI_JAY2JAY_122 | 35.0                            |
|              |                       |                               |                        |                    |                   |        |          |                   |             |                  |                    | Streptomyces phage VWB hypothetical<br>protein VWBp17              | 30.1                            |

|        |                     |   |   |       |       |      |      |        |      |   |   |                                                          |      |
|--------|---------------------|---|---|-------|-------|------|------|--------|------|---|---|----------------------------------------------------------|------|
|        |                     |   |   |       |       |      |      |        |      |   |   | Streptomyces phage SF3 hypothetical protein SF3_590      | 28.6 |
| ORF 8  | putative protein 8  |   | F | 2728  | 3054  | 68.8 | 109  | 12.57  | 4.91 |   |   | SH1 ORF 11 product                                       | 67.5 |
|        |                     |   |   |       |       |      |      |        |      |   |   | PH1 hypothetical protein HhPH1_gp09                      | 67.8 |
|        |                     |   |   |       |       |      |      |        |      |   |   | HHIV-2 putative protein 4                                | 65.5 |
|        |                     |   |   |       |       |      |      |        |      |   |   | SNJ1 ORF 17 product                                      | 40.0 |
|        |                     |   |   |       |       |      |      |        |      |   |   | Bacillus phage Shanette hypothetical protein SHANETTE_61 | 38.7 |
| gene 9 | VP1                 | + | F | 3472  | 8298  | 68.3 | 1609 | 176.87 | 4.23 |   | + | SH1 VP1                                                  | 34.7 |
|        |                     |   |   |       |       |      |      |        |      |   |   | PH1 capsid protein VP1                                   | 31.9 |
|        |                     |   |   |       |       |      |      |        |      |   |   | HHIV-2 VP1                                               | 32.2 |
| ORF 10 | putative protein 10 |   | F | 8300  | 8548  | 70.7 | 83   | 8.55   | 5.64 | 2 |   | SH1 ORF 14 product                                       | 76.1 |
|        |                     |   |   |       |       |      |      |        |      |   |   | HHIV-2 putative protein 6                                | 64.4 |
|        |                     |   |   |       |       |      |      |        |      |   |   | HSTV-1 hypothetical protein HSTV1_16                     | 41.0 |
| ORF 11 | putative protein 11 |   | F | 8545  | 8898  | 70.9 | 118  | 12.07  | 4.41 | 3 |   | SH1 ORF 15 product                                       | 83.8 |
|        |                     |   |   |       |       |      |      |        |      |   |   | His1 hypothetical protein His1V_gp13                     | 44.1 |
|        |                     |   |   |       |       |      |      |        |      |   |   | HHTV-2 hypothetical protein HHTV2_54                     | 38.4 |
| ORF 12 | putative protein 12 |   | F | 8891  | 9139  | 67.1 | 83   | 9.42   | 4.14 |   |   | SH1 ORF 16 product                                       | 62.4 |
| ORF 13 | putative ATPase     | + | R | 9913  | 9191  | 63.8 | 241  | 26.93  | 5.6  |   |   | PH1 putative ATPase                                      | 97.1 |
|        |                     |   |   |       |       |      |      |        |      |   |   | SH1 ORF 17 product (putative ATPase)                     | 96.2 |
|        |                     |   |   |       |       |      |      |        |      |   |   | HHIV-2 putative ATPase                                   | 92.9 |
|        |                     |   |   |       |       |      |      |        |      |   |   | SNJ1 putative ATPase                                     | 37.4 |
| ORF 14 | putative protein 14 |   | R | 10345 | 9914  | 66.2 | 144  | 15.46  | 4.32 |   | + | SH1 ORF 19 product                                       | 87.7 |
|        |                     |   |   |       |       |      |      |        |      |   |   | PH1 hypothetical protein HhPH1_gp15                      | 84.4 |
|        |                     |   |   |       |       |      |      |        |      |   |   | HHIV-2 putative protein 9                                | 84.6 |
|        |                     |   |   |       |       |      |      |        |      |   |   | HHIV-2 putative protein 10                               | 58.7 |
| ORF 15 | putative protein 15 |   | R | 10679 | 10338 | 67.5 | 114  | 12.27  | 4.84 |   |   |                                                          |      |
| ORF 16 | putative protein 16 |   | R | 11332 | 10676 | 68.5 | 219  | 22.84  | 3.33 |   | + | SH1 ORF 20 product                                       | 81.5 |
|        |                     |   |   |       |       |      |      |        |      |   |   | PH1 hypothetical protein HhPH1_gp16                      | 80.1 |
|        |                     |   |   |       |       |      |      |        |      |   |   | HHIV-2 putative protein 11                               | 68.9 |

|         |                     |   |       |       |      |     |       |       |   |                                     |      |
|---------|---------------------|---|-------|-------|------|-----|-------|-------|---|-------------------------------------|------|
| ORF 17  | putative protein 17 | R | 11757 | 11332 | 67.4 | 142 | 14.46 | 3.81  |   | PH1 hypothetical protein HhPH1_gp17 | 79.9 |
|         |                     |   |       |       |      |     |       |       |   | SH1 ORF 21                          | 80.9 |
|         |                     |   |       |       |      |     |       |       |   | HHIV-2 putative protein 12          | 60.6 |
| ORF 18  | putative protein 18 | R | 12172 | 11762 | 67.6 | 137 | 14.88 | 3.97  |   | PH1 hypothetical protein HhPH1_gp18 | 48.4 |
|         |                     |   |       |       |      |     |       |       |   | HHIV-2 putative protein 13          | 64.2 |
|         |                     |   |       |       |      |     |       |       |   | SH1 ORF 22 product                  | 46.3 |
| gene 19 | VP12                | F | 12412 | 12696 | 60.7 | 95  | 9.81  | 10.44 | 2 | SH1 VP12                            | 95.7 |
|         |                     |   |       |       |      |     |       |       |   | HHIV-2 VP 12                        | 92.6 |
|         |                     |   |       |       |      |     |       |       |   | PH1 capsid protein VP 12            | 93.6 |
| gene 20 | VP7                 | F | 12712 | 13226 | 63.6 | 185 | 19.89 | 4.38  |   | PH1 capsid protein VP 7             | 93.5 |
|         |                     |   |       |       |      |     |       |       |   | SH1 VP7                             | 93.5 |
|         |                     |   |       |       |      |     |       |       |   | HHIV-2 VP 7                         | 85.9 |
|         |                     |   |       |       |      |     |       |       |   | SNJ1 PB6                            | 32.4 |
| gene 21 | VP4                 | F | 13269 | 13967 | 65.8 | 233 | 25.98 | 4.14  |   | PH1 capsid protein VP 4             | 92.2 |
|         |                     |   |       |       |      |     |       |       |   | SH1 VP4                             | 93.1 |
|         |                     |   |       |       |      |     |       |       |   | HHIV-2 VP4                          | 90.1 |
|         |                     |   |       |       |      |     |       |       |   | SNJ1 PB2                            | 29.0 |
| ORF 22  | putative protein 22 | F | 13983 | 14198 | 63   | 72  | 7.65  | 3.71  |   | PH1 hypothetical protein HhPH1_gp22 | 79.5 |
|         |                     |   |       |       |      |     |       |       |   | SH1 ORF 26 product                  | 76.7 |
|         |                     |   |       |       |      |     |       |       |   | HHIV-2 putative protein 17          | 60.6 |
| ORF 23  | VP13 <sup>s</sup>   | F | 14202 | 14447 | 66.7 | 82  | 8.80  | 4.61  |   | PH1 capsid protein VP13             | 81.5 |
|         |                     |   |       |       |      |     |       |       |   | SH1 VP13                            | 80.2 |
|         |                     |   |       |       |      |     |       |       |   | HHIV-2 VP 13                        | 54.8 |
| gene 24 | VP2                 | F | 14449 | 16230 | 73.6 | 594 | 58.16 | 3.8   | + | SH1 VP2                             | 47.5 |
|         |                     |   |       |       |      |     |       |       |   | PH1 VP2                             | 47.4 |
|         |                     |   |       |       |      |     |       |       |   | HHIV-2 VP2                          | 52.7 |
| gene 25 | VP5                 | F | 16230 | 17045 | 69.9 | 272 | 28.57 | 4.33  |   | SH1 VP5                             | 69.6 |
|         |                     |   |       |       |      |     |       |       |   | PH1 capsid protein VP 5             | 69.0 |

|         |                     |   |   |       |       |      |     |       |      |   |                                                                 |      |
|---------|---------------------|---|---|-------|-------|------|-----|-------|------|---|-----------------------------------------------------------------|------|
|         |                     |   |   |       |       |      |     |       |      |   | HHIV-2 VP 5                                                     | 58.9 |
| gene 26 | VP10                |   | F | 17048 | 17569 | 67.8 | 174 | 17.68 | 4.33 | + | PH1 capsid protein VP 10                                        | 76.0 |
|         |                     |   |   |       |       |      |     |       |      |   | SH1 VP10                                                        | 65.9 |
|         |                     |   |   |       |       |      |     |       |      |   | HHIV-2 VP 10                                                    | 57.3 |
| gene 27 | VP9                 |   | F | 17572 | 18012 | 60.3 | 147 | 16.25 | 4.65 |   | SH1 VP9                                                         | 78.9 |
|         |                     |   |   |       |       |      |     |       |      |   | PH1 VP 9                                                        | 77.0 |
|         |                     |   |   |       |       |      |     |       |      |   | SNJ1 ORF 1                                                      | 31.0 |
| gene 28 | VP3                 |   | F | 18018 | 18998 | 61.7 | 327 | 35.67 | 4.11 |   | PH1 capsid protein VP3                                          | 54.2 |
|         |                     |   |   |       |       |      |     |       |      |   | SH1 VP3                                                         | 50.8 |
| gene 29 | VP6                 |   | F | 19005 | 19781 | 64.1 | 259 | 28.07 | 4.23 |   | PH1 capsid protein VP6                                          | 40.3 |
|         |                     |   |   |       |       |      |     |       |      |   | SH1 VP6                                                         | 37.9 |
| ORF 30  | putative protein 30 |   | F | 19781 | 20110 | 68.8 | 110 | 11.77 | 4.90 | 1 | SH1 ORF 34 product                                              | 77.7 |
|         |                     |   |   |       |       |      |     |       |      |   | PH1 hypothetical protein HhPH1                                  | 74.8 |
|         |                     |   |   |       |       |      |     |       |      |   | HHIV-2 putative protein 27                                      | 58.6 |
|         |                     |   |   |       |       |      |     |       |      |   | HCTV-2 hypothetical protein HCTV2 61                            | 27.6 |
| ORF 31  | putative protein 31 |   | R | 20339 | 20208 | 68.2 | 44  | 5.03  | 4.7  |   | PH1 hypothetical protein HhPH1_gp31                             | 67.4 |
| ORF 32  | putative protein 32 | + | R | 20587 | 20336 | 71.8 | 84  | 9.25  | 4.7  |   | -                                                               |      |
| ORF 33  | putative protein 33 |   | R | 20810 | 20589 | 67.6 | 74  | 7.91  | 4.78 |   | SH1 ORF 39 product                                              | 71.9 |
|         |                     |   |   |       |       |      |     |       |      |   | PH1 hypothetical protein HhPH1_gp33                             | 49.5 |
|         |                     |   |   |       |       |      |     |       |      |   | HHIV-2 putative protein 29                                      | 45.7 |
| ORF 34  | putative protein 34 | + | R | 21063 | 20848 | 67.6 | 72  | 7.95  | 4.48 |   | -                                                               |      |
| ORF 35  | putative protein 35 |   | R | 22091 | 21060 | 65.2 | 344 | 40.15 | 4.85 | + | Pseudomonas phage PaMx25 putative DNA topoisomerase             | 41.2 |
|         |                     |   |   |       |       |      |     |       |      |   | Roseobacter phage RDJL Phi 2 hypothetical protein RDJLphi2_gp23 | 40.1 |
|         |                     |   |   |       |       |      |     |       |      |   | Cellulophaga phage phi3ST:2 hypothetical protein phi3ST:2 gp62  | 39.5 |
|         |                     |   |   |       |       |      |     |       |      |   | Xylella phage Sano hypothetical protein Sano 37                 | 38.4 |
|         |                     |   |   |       |       |      |     |       |      |   | Salmonella phage BP12C hypothetical protein BP12C_28            | 38.4 |

|        |                     |   |   |       |       |      |     |       |      |   |                                                                 |      |
|--------|---------------------|---|---|-------|-------|------|-----|-------|------|---|-----------------------------------------------------------------|------|
|        |                     |   |   |       |       |      |     |       |      |   | Xylella phage Salvo hypothetical protein Salvo 33               | 36.3 |
|        |                     |   |   |       |       |      |     |       |      |   | Salmonella phage SPN19 hypothetical protein SPN19_026           | 36.1 |
|        |                     |   |   |       |       |      |     |       |      |   | Roseobacter phage RDJL Phi 1 hypothetical protein RDJLphi1_gp26 | 28.5 |
| ORF 36 | putative protein 36 |   | R | 22648 | 22088 | 69.9 | 187 | 20.52 | 6.05 |   | PH1 hypothetical protein HhPH1_gp35                             | 57.9 |
|        |                     |   |   |       |       |      |     |       |      |   | SH1 ORF 41 product                                              | 58.1 |
|        |                     |   |   |       |       |      |     |       |      |   | HHIV-2 putative protein 30                                      | 53.7 |
| ORF 37 | putative protein 37 |   | R | 23919 | 22645 | 68.5 | 425 | 46.80 | 4.66 |   | SH1 ORF 42 product                                              | 50.0 |
|        |                     |   |   |       |       |      |     |       |      |   | PH1 hypothetical protein HhPH1_gp36                             | 49.8 |
|        |                     |   |   |       |       |      |     |       |      |   | HHIV-2 putative protein 31                                      | 46.5 |
| ORF 38 | putative protein 38 |   | R | 24277 | 23921 | 70.3 | 119 | 12.59 | 4.29 |   | PH1 hypothetical protein HhPH1_gp37                             | 72.4 |
|        |                     |   |   |       |       |      |     |       |      |   | SH1 ORF 43 product                                              | 75.6 |
|        |                     |   |   |       |       |      |     |       |      |   | HHIV-2 putative protein 32                                      | 52.3 |
| ORF 39 | putative protein 39 |   | R | 25505 | 24261 | 68.5 | 415 | 46.36 | 4.36 | + | SH1 ORF 44 product                                              | 82.3 |
|        |                     |   |   |       |       |      |     |       |      |   | PH1 hypothetical protein HhPH1_gp38                             | 80.0 |
|        |                     |   |   |       |       |      |     |       |      |   | HHIV-2 putative protein 33                                      | 55.1 |
| ORF 40 | putative protein 40 |   | R | 25956 | 25699 | 64.3 | 86  | 9.98  | 4.45 |   | SH1 ORF 46 product                                              | 91.8 |
|        |                     |   |   |       |       |      |     |       |      |   | HHIV-2 putative protein 35                                      | 47.8 |
|        |                     |   |   |       |       |      |     |       |      |   | PH1 hypothetical protein HhPH1_gp40                             | 68.2 |
| ORF 41 | putative protein 41 | + | R | 26882 | 25959 | 70.3 | 308 | 35.01 | 4.6  | + | SH1 ORF 48 product                                              | 38.8 |
|        |                     |   |   |       |       |      |     |       |      |   | PH1 hypothetical protein HhPH1_gp42                             | 38.8 |
|        |                     |   |   |       |       |      |     |       |      |   | HHIV-2 putative protein 36                                      | 35.5 |
|        |                     |   |   |       |       |      |     |       |      |   | SH1 ORF 49 product                                              | 40.4 |
|        |                     |   |   |       |       |      |     |       |      |   | PH1 hypothetical protein HhPH1_gp43                             | 37.9 |
|        |                     |   |   |       |       |      |     |       |      |   | HHIV-2 putative protein 37                                      | 36.8 |
| ORF 42 | putative protein 42 | + | R | 27394 | 26879 | 69   | 172 | 18.77 | 4.55 |   | PH1 hypothetical protein HhPH1_gp44                             | 81.7 |
|        |                     |   |   |       |       |      |     |       |      |   | SH1 ORF 50 product                                              | 64.3 |
|        |                     |   |   |       |       |      |     |       |      |   | HHIV-2 putative protein 38                                      | 77.0 |

|        |                     |   |   |       |       |      |     |       |      |   |                                                                     |      |
|--------|---------------------|---|---|-------|-------|------|-----|-------|------|---|---------------------------------------------------------------------|------|
|        |                     |   |   |       |       |      |     |       |      |   | Halorubrum pleomorphic virus 3 ORF 6 product                        | 31.2 |
|        |                     |   |   |       |       |      |     |       |      |   | HHTV-1 hypothetical protein HHTV1 72                                | 27.9 |
| ORF 43 | putative protein 43 |   | R | 27507 | 27391 | 65.8 | 39  | 4.06  | 4.3  |   | PH1 hypothetical protein HhPH1_gp46                                 | 65.8 |
| ORF 44 | putative protein 44 | + | R | 28050 | 27643 | 74.3 | 136 | 14.48 | 4.27 | + | PH1 hypothetical protein HhPH1_gp47                                 | 74.6 |
|        |                     |   |   |       |       |      |     |       |      |   | SH1 ORF 51 product                                                  | 67.4 |
|        |                     |   |   |       |       |      |     |       |      |   | HHIV-2 putative protein 39                                          | 58.8 |
|        |                     |   |   |       |       |      |     |       |      |   | Environmental halophage eHP-31 hypothetical protein OSG_eHP31_00085 | 27.6 |
| ORF 45 | putative protein 45 |   | R | 28528 | 28178 | 71.2 | 117 | 12.83 | 4.04 |   | SH1 ORF 53 product                                                  | 78.8 |
| ORF 46 | putative protein 46 | + | R | 28737 | 28624 | 70.2 | 38  | 3.92  | 7.69 |   | SH1 ORF 54 product                                                  | 86.5 |
| ORF 47 | VP18 <sup>g</sup>   |   | R | 31055 | 28734 | 72.5 | 774 | 84.71 | 4.16 | + | SH1 ORF 55 product                                                  | 77.3 |
|        |                     |   |   |       |       |      |     |       |      |   | PH1 VP18                                                            | 33.9 |
|        |                     |   |   |       |       |      |     |       |      |   | HHIV-2 VP18                                                         | 33.8 |

<sup>a</sup> Predicted conserved domains, for detailed information about conserved domains see Table S5.

<sup>b</sup> F, forward (transcribed from left to right in the linear genome); R, reverse (transcribed from right to left in the linear genome).

<sup>c</sup> Nucleotide coordinates refer to the HCIV-1 genome sequence.

<sup>d</sup> Number of transmembrane helices (TMH).

<sup>e</sup> +, ORF/gene products with predicted coil-coiled region(s).

<sup>f</sup> BLAST search dated 21 March 2016. (Putative) proteins with  $\geq 25$  % amino acid similarity to HCIV-1 sequences are listed.

<sup>g</sup> Assignment is based on the sequence similarities with the corresponding sequences in SH1, PH1, and HHIV-2.
