# Supplementary material for: Archaeal Haloarcula californiae Icosahedral Virus 1 Highlights Conserved Elements in Icosahedral Membrane-Containing DNA Viruses from Extreme Environments
Source: PubMed Central journal article supplement (PMC4958249; doi:10.1128/mbio.00699-16), 2016-07-19
Supplement: mbo004162905st3.pdf [file mbo004162905st3.pdf]

TABLE S3. Repeats in HCIV-1 genome.

| Tandem repeats <sup>a</sup>                                           |                                                                                                                                                                                                                                                                                        |             |           |
|-----------------------------------------------------------------------|----------------------------------------------------------------------------------------------------------------------------------------------------------------------------------------------------------------------------------------------------------------------------------------|-------------|-----------|
| Coordinates <sup>b</sup>                                              | Consensus sequence (size in nt)                                                                                                                                                                                                                                                        | Copy number | Match (%) |
| 11044-11088 (ORF 16)                                                  | <u>cg</u> tcgccg <u>cc</u> g <u>tc</u> g <u>tc</u> ac (18)                                                                                                                                                                                                                             | 2.5         | 96        |
| 15186-15239 (ORF 24)                                                  | <u>cg</u> acgag <u>gc</u> g <u>cc</u> ag <u>cc</u> gc (21)                                                                                                                                                                                                                             | 2.5         | 81        |
| 15449-15503 (ORF 24)                                                  | <u>cc</u> gacgag <u>gc</u> g <u>cc</u> acg <u>gc</u> g (22)                                                                                                                                                                                                                            | 2.6         | 80        |
| 15754-15803 (ORF 24)                                                  | <u>g</u> acgacg <u>tc</u> gacg <u>g</u> accg <u>tc</u> (21)                                                                                                                                                                                                                            | 2.4         | 87        |
| 30127-30156 (ORF 47)                                                  | <u>ag</u> g <u>tc</u> g <u>tc</u> g <u>gc</u> ctcc (15)                                                                                                                                                                                                                                | 2.0         | 93        |
| 30492-30533 (ORF 47)                                                  | <u>g</u> tcg <u>tc</u> g <u>tc</u> g <u>cc</u> (12)                                                                                                                                                                                                                                    | 3.5         | 87        |
| 31197-31243<br>(right end of the genome)                              | <u>gc</u> ggtccgaccg <u>gc</u> ccct (18)                                                                                                                                                                                                                                               | 2.6         | 80        |
| Inverted repeats <sup>c</sup>                                         |                                                                                                                                                                                                                                                                                        |             |           |
| Coordinates <sup>b</sup>                                              | Sequence <sup>d</sup>                                                                                                                                                                                                                                                                  | Match (%)   |           |
| 11047-11087/16326-16286<br>(ORF 16/ORF 25)                            | <u>cg</u> tcgccg <u>tc</u> g <u>tc</u> accg <u>tc</u> gccg <u>cc</u> g <u>tc</u> g <u>tc</u> accg <u>tc</u> gccg                                                                                                                                                                       | 90          |           |
| 446-475/20161-20190<br>(Upstream ORF 1/<br>between ORF 30 and ORF 31) | <u>ag</u> g <u>gc</u> gacagacg <u>gc</u> ccg <u>tc</u> gagc <u>gc</u> ggtccg                                                                                                                                                                                                           | 96          |           |
| 15296-15394/29492- 29590<br>(ORF 24/ORF 47)                           | <u>tg</u> g <u>cc</u> gacgag <u>gc</u> g <u>gc</u> gag <u>tc</u> g-caaccag <u>gc</u> g <u>gc</u> g <u>cc</u> gacga<br>g <u>tc</u> g <u>gc</u> g <u>cc</u> ag <u>gc</u> g <u>gc</u> gacgacg <u>cc</u> g <u>cc</u> accg <u>tc</u> g <u>tc</u> gagcagc-<br>ccg <u>gc</u> gacg <u>cc</u> g | 75          |           |

<sup>a</sup> Tandem repeats found with Tandem Repeats Finder program.

<sup>b</sup> Nucleotide coordinates in HCIV-1 sequence.

<sup>c</sup> Inverted repeats found with Einverted program.

<sup>d</sup> Underlined, sequence mismatch; hyphen, gap in sequence.
