# Supplementary material for: Archaeal Haloarcula californiae Icosahedral Virus 1 Highlights Conserved Elements in Icosahedral Membrane-Containing DNA Viruses from Extreme Environments
Source: PubMed Central journal article supplement (PMC4958249; doi:10.1128/mbio.00699-16), 2016-07-19
Supplement: mbo004162905st4.pdf [file mbo004162905st4.pdf]

TABLE S4. Conserved domains in HCIV-1 predicted proteins.

| HCIV-1<br>(putative)<br>proteins | Domain hit <sup>a</sup> |                           |                                                                                                         |                           |                   |
|----------------------------------|-------------------------|---------------------------|---------------------------------------------------------------------------------------------------------|---------------------------|-------------------|
|                                  | Name                    | Accession                 | Description                                                                                             | Amino acid<br>Coordinates | BLAST e-<br>value |
| VP1                              | PCNA                    | <a href="#">cd00577</a>   | Proliferating Cell Nuclear Antigen (PCNA) domain found in eukaryotes and archaea                        | 376-601                   | 4.51e-20          |
|                                  | PCNA                    | <a href="#">cd00577</a>   | Proliferating Cell Nuclear Antigen (PCNA) domain found in eukaryotes and archaea                        | 5-223                     | 3.22e-10          |
|                                  | PRK01115                | <a href="#">PRK01115</a>  | DNA polymerase sliding clamp                                                                            | 363-602                   | 2.15e-31          |
|                                  | PRK01115                | <a href="#">PRK01115</a>  | DNA polymerase sliding clamp                                                                            | 3-247                     | 2.43e-09          |
|                                  | DnaN                    | <a href="#">COG0592</a>   | DNA polymerase sliding clamp subunit (PCNA homolog)                                                     | 376-516                   | 1.42e-04          |
|                                  | TIGR03491               | <a href="#">TIGR03491</a> | RecB family nuclease, putative, TM0106 family                                                           | 91-159                    | 6.96e-04          |
| Putative<br>ATPase               | AAA_10                  | <a href="#">pfam12846</a> | AAA-like domain                                                                                         | 92-192                    | 1.39e-07          |
|                                  | Yjgr                    | <a href="#">COG0433</a>   | Archaeal DNA helicase HerA or a related bacterial ATPase                                                | 119-211                   | 2.51e-04          |
| VP5                              | cpdB                    | <a href="#">PRK09420</a>  | Bifunctional 2',3'-cyclic nucleotide 2'-phosphodiesterase/3'-nucleotidase periplasmic precursor protein | 167-264                   | 9.99e-03          |
| Putative<br>protein 32           | phenyl_P_alpha          | <a href="#">TIGR02723</a> | Phenylphosphate carboxylase, alpha subunit                                                              | 7-50                      | 2.69e-03          |
| Putative<br>protein 33           | PRK14293                | <a href="#">PRK14293</a>  | Chaperon protein DnaJ                                                                                   | 38-71                     | 7.25e-03          |
| Putative<br>protein 34           | SIR2                    | <a href="#">COG0846</a>   | NAD-dependent protein deacetylases, SIR2 family                                                         | 2-50                      | 1.77e-03          |
|                                  | PRK06082                | <a href="#">PRK06082</a>  | 4-aminobutyrate aminotransferase                                                                        | 30-49                     | 5.24e-03          |
|                                  | SIR2-fam                | <a href="#">cd01407</a>   | Sir2 proteins (gene regulators)                                                                         | 10-50                     | 9.46e-03          |
| Putative<br>protein 41           | DUF4326                 | <a href="#">pfam14216</a> | Domain of unknown function (DUF4326)                                                                    | 206-279                   | 1.74e-10          |
|                                  | PTZ00121                | <a href="#">PTZ00121</a>  | MAEBL                                                                                                   | 3-227                     | 4.11e-04          |
| Putative<br>protein 42           | TPMT                    | <a href="#">pfam05724</a> | Thiopurine S-methyltransferase (TPMT)                                                                   | 83-164                    | 2.04e-03          |
| Putative<br>protein 44           | Sigma70_r4_2            | <a href="#">pfam08281</a> | Sigma-70, region 4                                                                                      | 65-108                    | 1.18e-07          |
|                                  | Sigma70_r4              | <a href="#">cd06171</a>   | Sigma70, region (SR) 4                                                                                  | 65-105                    | 3.36e-05          |
|                                  | txf                     | <a href="#">PRK03975</a>  | Putative transcriptional regulator                                                                      | 60-134                    | 5.58e-09          |
|                                  | SigX5                   | <a href="#">TIGR02960</a> | RNA polymerase sigma-70 factor, TIGR02960 family                                                        | 32-127                    | 2.28e-07          |
|                                  | RpoE                    | <a href="#">COG1595</a>   | DNA-directed RNA polymerase specialized sigma subunit, sigma24 homolog                                  | 10-105                    | 3.08e-07          |
| Putative<br>protein 46           | HypA                    | <a href="#">pfam01155</a> | Hydrogenase expression/synthesis hypA family                                                            | 6-37                      | 3.00e-04          |
|                                  | hypA                    | <a href="#">PRK00564</a>  | Hydrogenase nickel incorporation protein                                                                | 5-31                      | 9.57e-03          |
|                                  | PriA                    | <a href="#">COG1198</a>   | Primosomal protein N' (replication factor Y) - superfamily II helicase                                  | 3-34                      | 3.74e-05          |

<sup>a</sup> Hits were found with BLASTp program, search dated 21 March 2016 (e-value threshold 0.01).
