# Supplementary material for: Archaeal Haloarcula californiae Icosahedral Virus 1 Highlights Conserved Elements in Icosahedral Membrane-Containing DNA Viruses from Extreme Environments
Source: PubMed Central journal article supplement (PMC4958249; doi:10.1128/mbio.00699-16), 2016-07-19
Supplement: mbo004162905st5.pdf [file mbo004162905st5.pdf]

TABLE S5. HCIV-1-related elements in archaeal genomes.

| Archaeal species                                            | HCIV-1 ORFs/genes <sup>a</sup>                                                                                                                      |
|-------------------------------------------------------------|-----------------------------------------------------------------------------------------------------------------------------------------------------|
| <i>Halobiforma lacisalsi</i><br>(provirus HaloLacP1)        | 5, 8, 9 (VP1), 11, 13 (putative ATPase, ~75%), 14, 16, 17, 18, 19 (VP12), 20 (VP7, ~66%), 21 (VP4, ~67%), 23, 24 (VP2), 25 (VP5), 26 (VP10), 42, 44 |
| <i>Haladaptatus paucihalophilus</i><br>(provirus HalaPauP1) | 8, 9 (VP1), 11, 13 (putative ATPase, ~76%), 14, 16, 18, 19 (VP12), 20 (VP7, ~70%), 21 (VP4, ~69%), 24 (VP2), 25 (VP5), 26 (VP10), 27 (VP9)          |
| <i>Haladaptus cibarius</i><br>(provirus HalaCibP1)          | 13 (putative ATPase, ~76%), 14, 16, 18, 20 (VP7, ~69%), 21 (VP4, ~67%), 24 (VP2), 25 (VP5), 26 (VP10), 27 (VP9)                                     |
| <i>Natrialba aegyptia</i>                                   | 8, 11, 13 (putative ATPase, ~33%), 28 (VP3), 29 (VP6), 42                                                                                           |
| <i>Natrinema versiforme</i>                                 | 8, 11, 13 (putative ATPase, ~31%), 28 (VP3), 29 (VP6), 42                                                                                           |
| <i>Natrialba asiatica</i>                                   | 8, 11, 13 (putative ATPase, ~33%), 29 (VP6), 42                                                                                                     |
| <i>Natrinema</i> sp. J7-2                                   | 8, 13 (putative ATPase, ~32%), 28 (VP3), 29 (VP6), 42                                                                                               |
| <i>Halomicrobium mukahataei</i>                             | 11, 13 (putative ATPase, ~ 37% to provirus HaloMukP1 and ~ 29% to provirus HaloMukP2), 29 (VP6), 42                                                 |
| <i>Haloterrigena thermotolerans</i>                         | 8, 13 (putative ATPase, ~32%), 28 (VP3), 29 (VP6), 42                                                                                               |
| <i>Natrinema gari</i>                                       | 8, 11, 28 (VP3), 29 (VP6)                                                                                                                           |
| <i>Haloterrigena jeotgali</i>                               | 8, 28 (VP3), 29 (VP6), 42                                                                                                                           |

<sup>a</sup> HCIV-1 ORFs/genes with detected homologous proteins in archaeal genomes (search dated 21 March 2016). (%), amino acid similarities shown for conserved proteins (MCPs and ATPase).
